1 SELECTION DRIVES THE EVOLUTION OF CONVERGENT GENE EXPRESSION  
2 CHANGES DURING TRANSITIONS TO CO-SEXUALITY IN HAPLOID SEXUAL  
3 SYSTEMS

4 Guillaume G. Cossard<sup>1</sup>, Olivier Godfroy<sup>1</sup>, Zofia Nehr<sup>1</sup>, Corinne Cruaud<sup>2</sup>, J. Mark Cock<sup>1</sup>, Agnieszka Lipinska<sup>1,3</sup>,  
5 Susana M. Coelho<sup>1,3\*</sup>

6 <sup>1</sup>Sorbonne Université, UPMC Univ Paris 06, CNRS, Integrative Biology of Marine Models, Station Biologique de Roscoff,  
7 CS 90074, F-29688, Roscoff, France <sup>2</sup>Genoscope, Institut de Biologie François Jacob, CEA, Université Paris-Saclay, Evry,  
8 France <sup>3</sup>Max Plank Institute for Developmental Biology, Tübingen, Germany

9 \*susana.coelho@tuebingen.mpg.de

10 **ABSTRACT**

11 Co-sexuality has evolved repeatedly from ancestors with separate sexes across a wide range of taxa. The  
12 switch to co-sexuality is expected to involve major molecular readjustments at the level of gene expression  
13 patterns, as modified males or females will express the opposite sexual function for which their phenotypes  
14 have been optimized. However, the molecular changes underpinning this important transition remain  
15 unknown, particularly in organisms with haploid sexual systems such as bryophytes, red and brown algae.  
16 Here, we explore four independent events of emergence of co-sexuality from uni-sexual (dioicous)  
17 ancestors in brown algal clades in order to examine the nature, evolution and degree of convergence of  
18 gene expression changes that accompany the breakdown of dioicy. The amount of male versus female  
19 phenotypic differences in dioicous species were not correlated with the extent of sex-biased gene  
20 expression, in strike contrast to what is observed in animals. Although sex-biased genes exhibited a high  
21 turnover rate during brown alga diversification, their predicted functions were remarkably conserved.  
22 Transition to co-sexuality consistently involved adaptive gene expression shifts and rapid sequence  
23 evolution, particularly of male-biased genes. The gene expression profiles of co-sexual species were more  
24 similar to those of females than to males of related dioicous species, suggesting that the former may have  
25 arisen from ancestral females. Finally, we identified extensive convergent gene expression changes  
26 associated with the transition to co-sexuality, and these changes appear to be driven by selection. Together,  
27 our observations provide novel insights on how co-sexual systems arise from ancestral, haploid UV sexual  
28 systems.

29

30

31

32

### 33 INTRODUCTION

34 Eukaryotic organisms exhibit a wide diversity of sexual systems, ranging from separate sexes (referred to  
35 as gonochorism in animals and dioecy in plants) to co-sexuality (combined sexes), and several theories have  
36 been developed to explain what conditions favour which strategy (Ghiselin, 1969; Charnov et al., 1976;  
37 Maynard Smith, 1978; Charnov, 1982; Charlesworth, 1999, 2006; Barrett, 2002; Vamosi et al., 2003; Jarne  
38 & Auld, 2006; Meagher, 2007). The evolution of this diversity often involved transitions between sexual  
39 systems. For example, separate sexes have evolved from co-sexual ancestors independently many times in  
40 several eukaryotic lineages, and the fundamental mechanisms and evolutionary drivers of this important  
41 transition have been intensively studied in many organisms (reviewed in <sup>1,2</sup>). Frequently, organisms with  
42 separate sexes display marked sexual dimorphism in a range of morphological, behavioral and physiological  
43 traits. Females and males are nevertheless genetically similar with the exception of the sex-specific regions  
44 of their sex chromosomes. While sex-chromosomes necessarily play a role in the expression differences  
45 between sexes, most of sex-biased gene expression involves autosomal genes <sup>3-5</sup>. Differences in autosomal  
46 gene expression patterns between sexes may be associated with different physiological processes directly  
47 linked to the production of male or female gametes (primary sexual dimorphism) or to the consequences  
48 of sexual selection and/or sexual specialization (secondary sexual dimorphism) that may occur once  
49 separate sexes have evolved <sup>6</sup>.

50 While the emergence of separate sexes from co-sexual ancestors and the evolution of sexual dimorphism  
51 have been thoroughly investigated <sup>5,7-9</sup>, less attention has been devoted to the opposite transition, i.e. from  
52 separate sexes to co-sexuality. Transitions to co-sexuality have occurred frequently during eukaryotic  
53 evolution and are relatively common in animals (e.g. Denver et al, 2011; Avise & Mank, 2009; reviewed in  
54 Weeks, 2012) and land plants (e.g. Lloyd, 1975; Pannell, 1997 Schaefer and Renner, 2010; reviewed in  
55 Renner, 2011). In flowering plants this transition was believed to be rare but recent studies are increasingly  
56 providing evidence that dioecy-to-monoecy transitions may have occurred frequently <sup>10,11</sup>. Evolutionary  
57 models intending to decipher the causes of such transitions invoke the sex-allocation theory <sup>12</sup> and the  
58 deterministic fate of genetic modifiers causing the acquisition of an opposite-sex function <sup>13,14</sup>. However,  
59 empirical knowledge on the proximate mechanisms and forces driving the shift from separate sexes to co-  
60 sexuality remains largely elusive.

61 Transitions from separate sexes to co-sexuality are also prevalent in eukaryotic lineages other than animals  
62 and flowering plants, and in particular those that express sex during the haploid stage of their life cycles. In  
63 organisms such as bryophytes, liverworts, green, red and brown algae, male and female sexes are  
64 expressed during the haploid (gametophyte) stage <sup>15</sup>. Genetic sex determination in organisms with haploid  
65 sexual systems occurs during meiosis (and not at fertilisation as in XY and ZW systems) <sup>16</sup>, depending on  
66 whether spores inherit a U or V chromosome <sup>17,18</sup>. Spores receiving a V sex chromosome will develop into  
67 a male individual (male gametophyte) and the spores inheriting a U sex chromosome will grow into females  
68 (female gametophytes). Organisms with haploid sex determination may also display epigenetic sex  
69 determination (so called monoicy), where an haploid, co-sexual, individual gametophyte may produce both  
70 male and female sexual structures <sup>19,20</sup>. Despite the prevalence of haploid sexual systems among  
71 eukaryotes, the mechanisms underlying transitions from dioicy to monoicy are so far unknown.

72 In this context, the brown algae represent a particularly attractive group for studies of the evolution of  
73 sexual systems and breakdown of dioicy. The brown algae are part of the stramenopile (or heterokont)  
74 supergroup, which also includes diatoms and oomycetes, and they have diverged from the Archaeplastida  
75 lineage at the time of the eukaryotic crown radiation <sup>21</sup>. Most brown algae have a haplo-diplontic life cycle,  
76 with a haploid gametophyte generation alternating with a diploid sporophyte generation. In these brown  
77 algae, sexuality is expressed in the haploid generation, with male and female gametes either produced by  
78 the same (monoicy) or on two separate individuals (dioicy). Dioicy is the prevalent reproductive system  
79 <sup>19,22</sup>. This situation contrasts markedly with that described for flowering plants, where only about 6% of  
80 extant species have separate sexes and is more similar to that of bryophytes and liverworts <sup>20</sup>. Dioicous  
81 brown algae may exhibit a broad range of levels of sexual dimorphism, both at the level of the  
82 gametophytes but also between male versus female gametes size <sup>19,22</sup>. While the predicted ancestral state  
83 in the brown algae is dioicy, transitions to monoicy have occurred frequently and independently in the  
84 different clades <sup>22,23</sup>. The independent emergence of monoicous lineages from dioicous ancestors makes  
85 this group particularly interesting to examine the genomic consequences and mechanisms underlying the  
86 breakdown of dioicy.

87 Here, we explore multiple, repeated events of loss of dioicy (Figure 1) to investigate the molecular basis  
88 and level of convergence of the shifts to co-sexuality. We demonstrate a lack of correlation between  
89 phenotypic sexual dimorphism and gene expression levels among dioicous brown algae. Ancestral state  
90 reconstruction indicated high turnover rates of sex-biased genes, yet independently recruited sex-biased  
91 genes shared similar functions across the species. We then focused on changes in gene expression patterns  
92 of orthologous genes that are specifically or preferentially expressed in haploid males and females, when  
93 they function in a monoicous context. Male-biased genes were particularly concerned by both adaptive  
94 expression shifts and faster evolutionary rates associated with the transition to monoicy. Monoicous  
95 species displayed expression profiles that were more similar to those of the female of the closely related  
96 dioicous species than to the male. Finally, we identified a striking amount of convergent gene expression  
97 changes associated with the emergence of co-sexuality, which were likely driven by selection.

## 98 RESULTS

99 The present study examines sex-biased gene expression in dioicous brown algae and the gene expression  
100 changes associated with the transition from dioicy to monoicy. We based our analysis on transcriptomes  
101 sequenced from pairs of dioicous-monoicous species in four major clades of brown algae spanning app.  
102 200 million years of evolution<sup>24</sup>. The transitions are predicted to have occurred at different times in the  
103 past (between 20 and 88 MY; Figure 1). Each pair represents an independent transition from dioicy to  
104 monoicy. We chose dioicous species with different levels of gamete dimorphism, reflecting the diverse  
105 levels of gamete dimorphism occurring across brown algae.

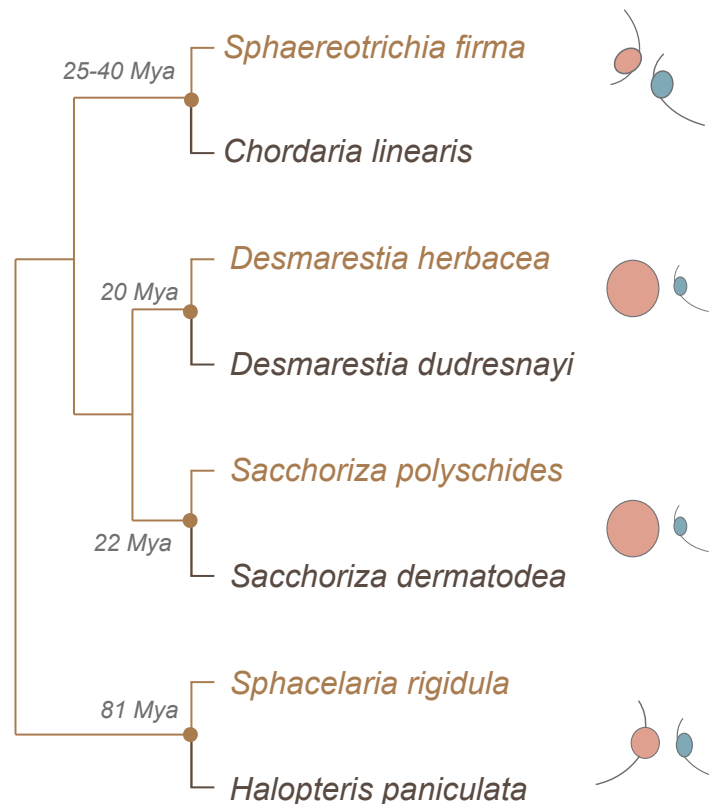

Figure 1. Diagram of the phylogeny of the eight species of brown algae investigated. Approximate estimated age of nodes is based on (Kawai et al., 2015); O. de Clerck pers. communication). A schematic view of typical gamete size differences (female in red, male in blue) per species pair is presented.

#### 106 SEX-BIASED GENE EXPRESSION IN DIOICOUS BROWN ALGAE

107 Gene expression patterns in gametophytes of the eight brown algal species were measured by deep  
108 sequencing (RNA-seq) of cDNA from male, female and co-sexual gametophytes. Transcript abundance  
109 (measured as transcripts per million, TPM) was strongly correlated between biological replicates with  $r^2$   
110 ranging from 0.89 to 0.99 (Table S1). Counts of expressed genes (TPM>5<sup>th</sup> percentile counts across all genes  
111 in at least two samples) identified a number of expressed genes that ranged from 13,180 to 27,391 (Figure  
112 S2, Table S1).

113 Deseq2 was used to identify genes that were differentially expressed in each of the sexes of the dioicous  
114 species<sup>25</sup>. The analysis retained only genes that displayed at least a 2-fold change expression level between  
115 sexes (FC>2,  $p_{adj}$ <0.05). Note that sex-linked genes (genes located in the sex-specific regions on the V (male)

116 and U (female) sex chromosomes; see methods), were removed from the set of sex-biased genes and thus

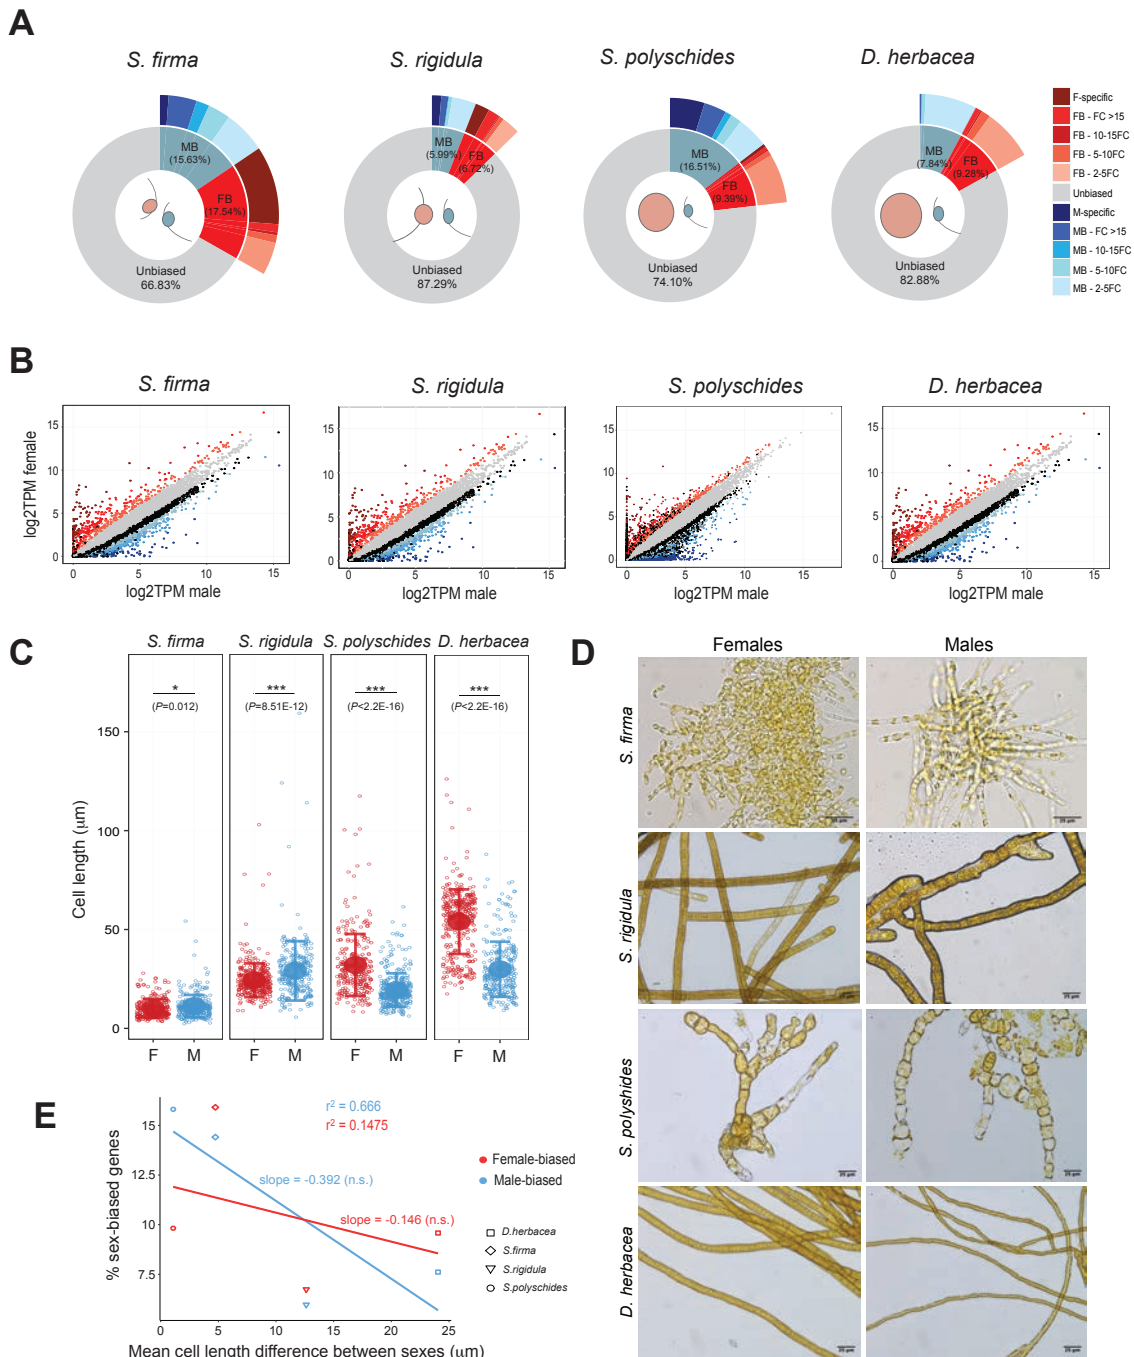

Figure 2. Patterns of sexual dimorphism in dioicous brown algae. A) Pie charts representing the fractions of sex-biased genes among expressed genes (female-bias in red, male-bias in blue) in the four dioicous species. Gradients of colors represent the intensity of expression fold-change (FC), from 2FC difference to more than 15FC. The percentages are calculated based on the total number of expressed genes averaged across sexes. B) Comparison of gene expression levels, in  $\log_2(\text{TPM}+1)$ , between males and females within dioicous species. Colour patterns follow the ones used in panel A, except for black points which represent unbiased genes that presented a  $\text{FC} > 2$ . C) Scatterplots of the lengths of cells of immature gametophytes of dioicous species. The mean and standard deviations are plotted per sex per species. Stars indicate significant difference between mean cell length, tested with t-tests.  $*0.01 < P < 0.05$ ;  $**0.001 < P < 0.01$ ;  $***P < 0.001$ . D) Micrographs of male and female immature gametophytes viewed under an inverted light microscope for each dioicous species investigated. E) Linear regressions of the fraction of female- and male-biased genes (in red and blue, respectively) among expressed genes against the mean difference in cell length recorded between the sexes (in  $\mu\text{m}$ ), in the four dioicous species investigated.

117 excluded from further analysis.

118 All four dioicous brown algae displayed substantial sex-biased gene expression, at least compared with  
119 plants and other brown alga<sup>7,9,26</sup> ranging from 12.7 % of the expressed genes in *S. rigidula* to 33.3% in *S.*  
120 *firma* (Figure 2A-2B, Table S2). We found similar proportions of male-biased compared with female-biased  
121 genes for the majority of the studied species (Figure 2A-2B) with the exception of *S. polyschides*, where  
122 male-biased genes were more abundant than female-biased genes (15.81% male-biased genes versus  
123 9.82% female-biased genes; Chi<sup>2</sup>-test  $P < 2.2 \times 10^{-16}$ ).

#### 124 *SEX-BIASED GENE EXPRESSION AND PHENOTYPIC SEXUAL DIMORPHISM*

125 To investigate the link between sex-biased gene expression and the level of sexual dimorphism, we carried  
126 out morphometric measurements of male and female gametophytes complemented with literature  
127 searches. These measurements allowed us to quantify the amount of phenotypic dimorphism present in  
128 each of the four dioicous species (Table S3, Figure 2C). In all dioicous species, gamete size dimorphism was  
129 coherent with sexual differences in terms of gametophyte cell size (Table S3). For example, *D. herbacea*  
130 gametophytes presented marked sexual dimorphism both at level of gamete size and gametophyte cell  
131 length, whereas *S. firma* was the species with least sexual difference both in terms of gametophyte  
132 morphology and gamete size (Table S3, Figure 2C-D).

133 In animals, sexual differences at the phenotypic level are correlated with levels of sex-biased gene  
134 expression<sup>8,27</sup>, but this correlation has not been found in plants<sup>26</sup>. We compared the differences in  
135 gametophyte cell size between males and females with the proportion of sex-biased genes in each of the  
136 four dioicous brown algal species. We detected no correlation between phenotypic sexual dimorphism  
137 (gametophyte cell size) and the number of sex-biased genes (Figure 2E). For instance, *S. firma* was the  
138 species that exhibited the highest level of sex-biased gene expression and nonetheless presented the  
139 lowest level of phenotypic sexual dimorphism.

140 Taken together, our observations indicate a considerable level of sex-biased gene expression in the four  
141 dioicous species studied here, but the level of sex-biased gene expression did not reflect the level of  
142 morphological dimorphism between males and females.

#### 143 *EVOLUTION OF SEX-BIASED GENE EXPRESSION IN DIOICOUS SPECIES*

144 We next investigated how sex-biased gene expression has evolved by comparing the four dioicous brown  
145 algal species. Orthofinder identified a total of 14,017 orthogroups (OGs), of which 2,098 contained only  
146 one gene per species and therefore represented the set of 1:1:1:1 OGs. An additional 2,778 OGs had a  
147 single member in each of three of the studied species (i.e., the gene was missing in the fourth species). We  
148 considered that these 1:1:1:0 OGs, which likely represent single copy ancestral genes that were lost in one  
149 of the species, also provide useful information about conservation of sex-biased gene expression. Note that  
150 the 1:1:1:0 OGs could also represent OGs where one of the genes is missing from one of the genome  
151 assemblies, particularly the draft genome assembly (*S. rigidula*). Furthermore, we also included 1,085  
152 orthogroups with a duplicated gene in a single species that aligned along more than 60% of their length  
153 (Figure 3A), resulting in 5,961 'dioicous single-copy orthologs' (DSOs).

154 We then used maximum likelihood approaches to infer the ancestral states of sex-biased gene expression

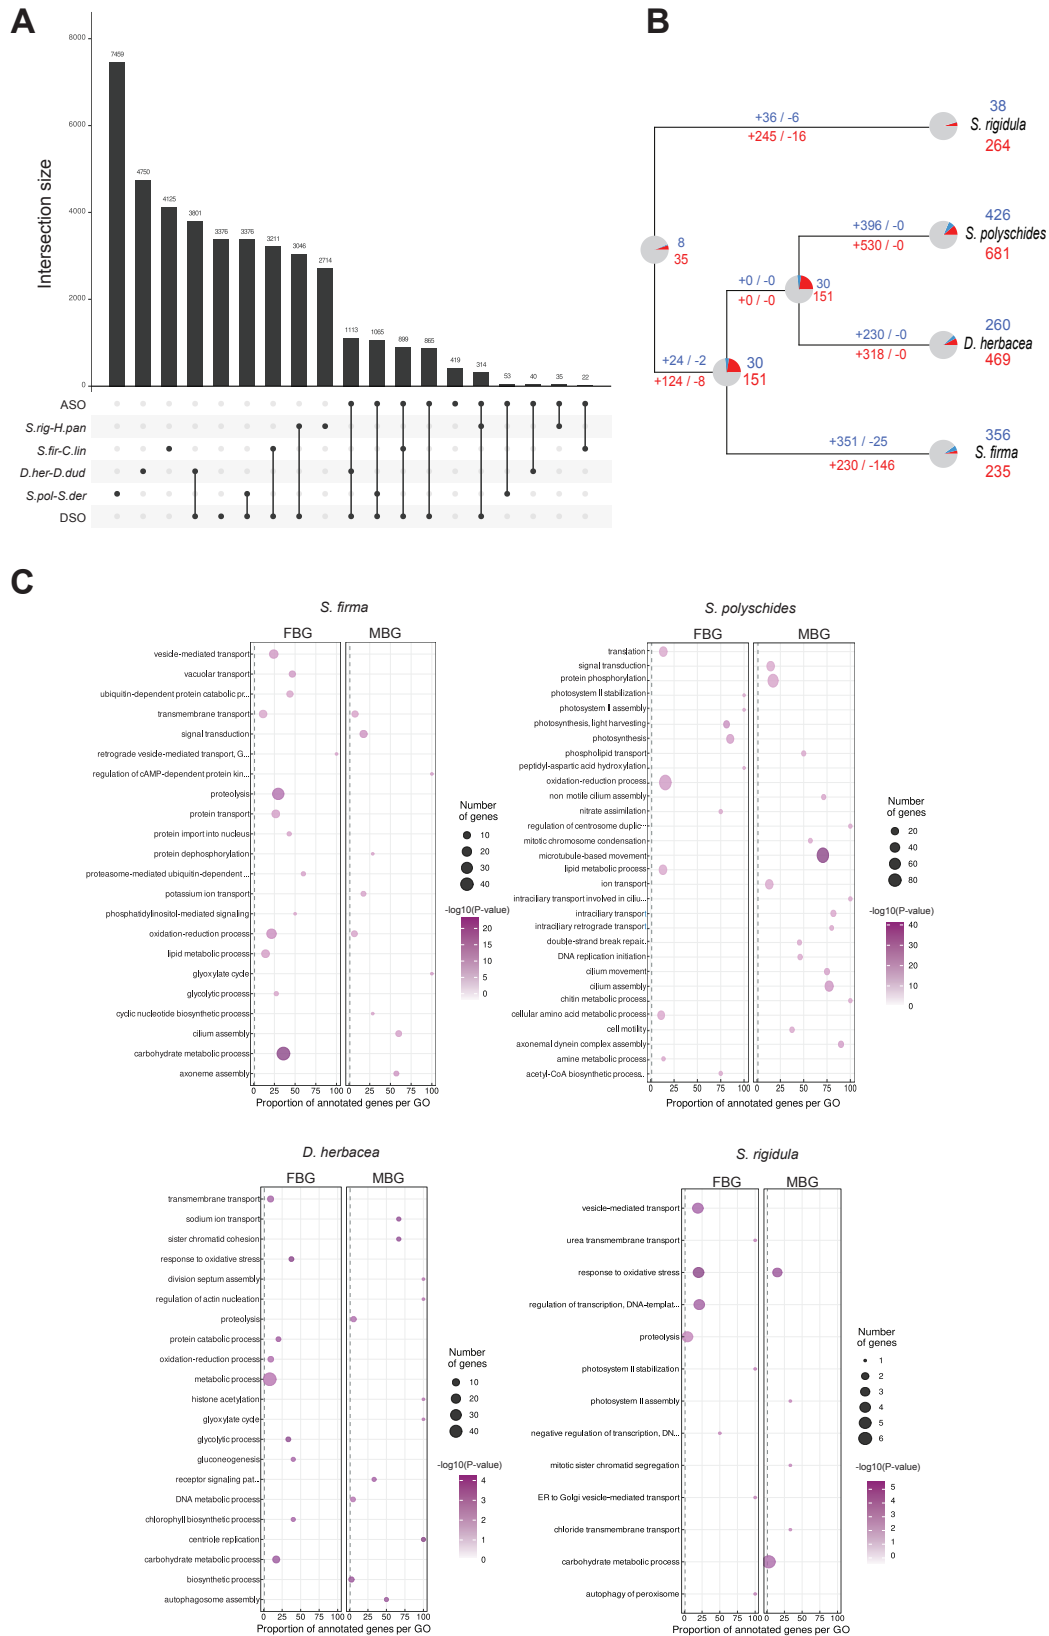

Figure 3. Single copy orthologs gene sets and sex-biased genes ancestry. A) Representation of intersects across single-copy ortholog gene sets (i.e., the four PSO, DSO and ASO) using UpSetR. Bars represent the number of genes in the intersect represented below the histogram. PSO: pairwise single-copy orthologs. DSO: dioicous single-copy orthologs. ASO: All species single-copy orthologs. B) Reconstruction of ancestral sex-biased gene sets across the four dioicous species. The number of inferred sex-biased genes (female-bias in red, male-bias in blue) at ancestral nodes as well as the inferred gain and loss of sex-biased genes along branches are displayed. C) Enriched GO-terms associated with sex-biased genes from each

155 across these dioicous species (Figure 3B). Our analysis identified very few genes that were predicted to be  
156 ancestrally sex-biased, with the vast majority having evolved sex-bias at some point along the branches.  
157 Among the 2,116 sex-biased DSOs in at least one species, only 43 (2.03%) were inferred to be sex-biased  
158 in the last common ancestor of the four brown algal species (Figure 3B). Accordingly, no DSOs were  
159 consistently sex-biased across the four species (not different from what is expected by chance, exact test  
160 multi-set intersection  $P = 0.506$ ). A total of 139 OGs exhibited a bias in one species that was inconsistent  
161 with the direction of bias observed in at least one other species (Table S4).

162 Although the above analysis showed that sex-bias genes were not conserved among the four species, we  
163 examined if sex-biased genes in different species were involved in similar functions, by comparing gene  
164 ontology (GO) terms of sex-biased genes across species using Blast2Go<sup>28</sup>. We detected significant  
165 enrichment of GO terms for biological processes related to ‘microtubule’, ‘ion transport’ and ‘cilium’  
166 consistently for male-biased genes across all dioicous species. Conversely, the sets of female-biased genes  
167 of all four species were enriched for GO terms such as ‘photosynthesis’, metabolism, ‘oxidation/reduction  
168 processes’ (Figure 3C, Table S5).

169 Taken together, our results indicate that whilst the different species do not share the same sex-biased gene  
170 set, males and females across these brown algae display a striking convergence in terms of sex-biased gene  
171 functions.

#### 172 *SEX-BIASED GENE EXPRESSION FATE DURING TRANSITION TO MONOICY*

173 To study changes in sex-biased gene expression that accompany the transition from dioicy to monoicy, we  
174 first identified single-copy orthologous genes for each of the four dioicous-monoicous sister species pairs



**A**

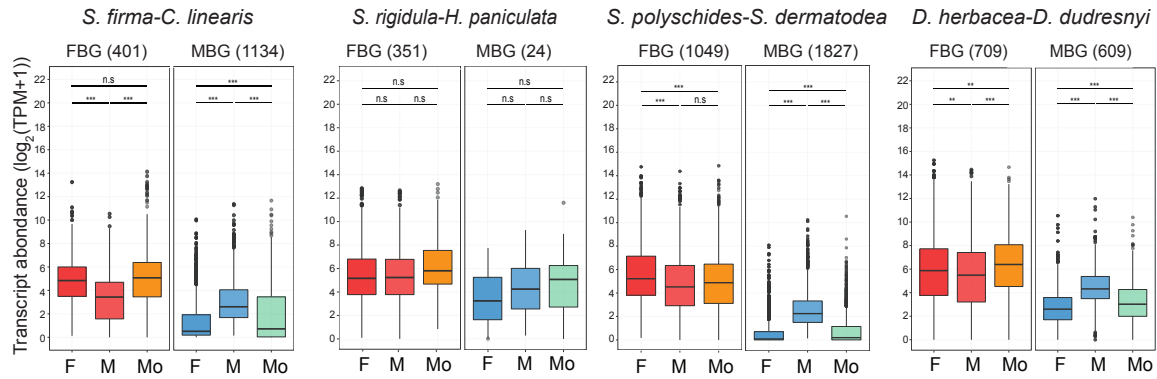

**B**

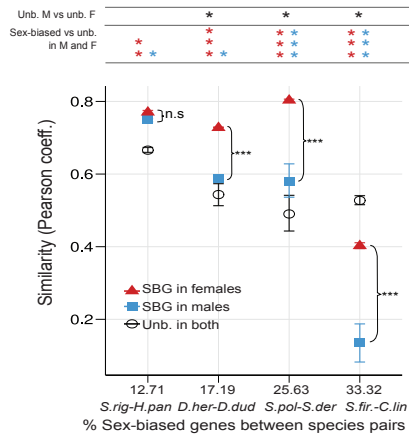

**C**

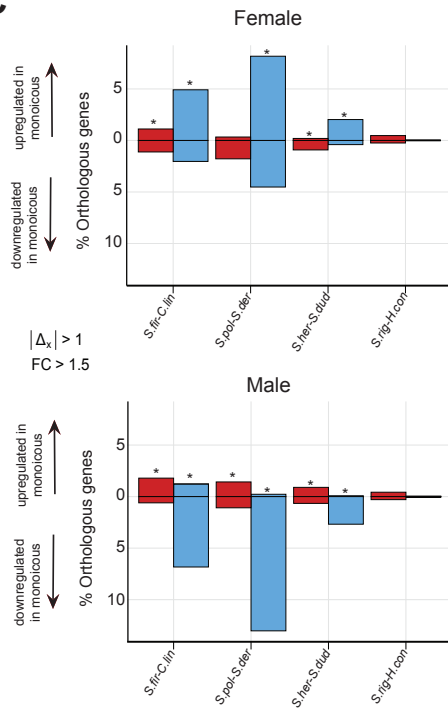

**D**

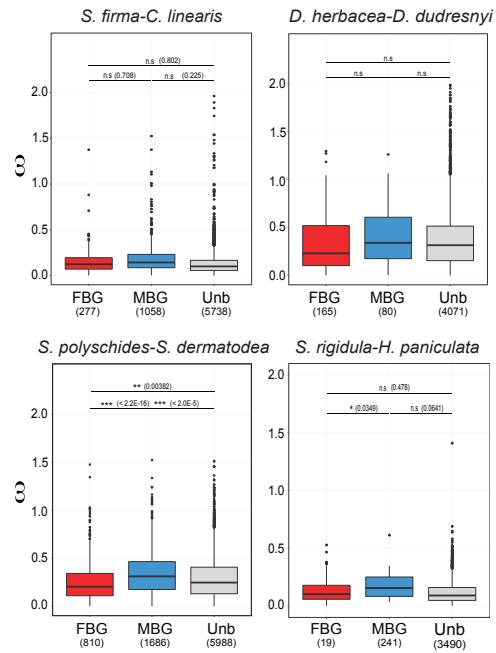

**E**

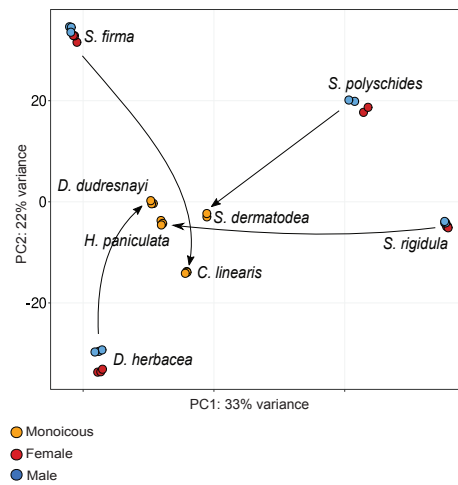

Figure 4. Evolution of sex-biased genes during transitions to monoicy. A) Comparison of gene expression levels within species pairs, in  $\log_2(\text{TPM}+1)$ , using PSO gene sets. F: females. M: males. Mo: monoicous. The number of female-biased (FBG) and male-biased genes (MBG) among PSO are displayed. Statistical tests are permutation t-tests using 100,000 permutations. B) Comparisons of similarity index values (Pearson coefficients) between expression profiles (in  $\log_2(\text{TPM}+1)$ ) of genes of dioicous and monoicous species within species pairs (PSO). Similarity index are represented separately for sex-biased genes in females (red) and in males (blue), as well as for unbiased genes averaged across sexes (black). Pearson coefficients were plotted for each species pair in increasing order of the proportion of SBG among expressed genes of dioicous species. Stars in the top pannel represent significant differences between Pearson coefficients, taking into account the correlations between compared gene sets, using the *cocor* package in R. Red and blue stars indicate a significant difference between females (red stars) or males SBG (blue stars) coefficients with unbiased genes coefficients. Top panel black stars indicate a significant difference of Pearson coefficients of unbiased genes between males and females. Significant differences of coefficients between sex-biased genes in females and males are indicated directly on the plot. \* :  $0.01 < P < 0.05$ ; \*\* :  $0.001 < P < 0.01$ ; \*\*\* :  $P < 0.001$ . C) Fraction of female-biased genes (red) and male-biased genes (blue) with an absolute value of  $\Delta_x > 1$  and a fold-change  $> 1.5$ , calculated within species pairs (on PSO). Downregulated genes in the monoicous species are represented below the  $y=0$  line ( $\Delta_x < -1$ ), upregulated genes in the monoicous species are represented above the  $y=0$  line ( $\Delta_x > 1$ ). Stars indicate a significant over-representation of female-biased (red star) or male-biased genes (blue star) with an absolute  $\Delta_x > 1$  compared with the proportion of unbiased genes with  $\Delta_x > 1$ , tested using Fisher exact tests. A reminder of differences between male and female gamete size within species pair is sketched below the x-axis. D) Sequence divergence, measured as  $d_N/d_S(w)$ , between dioicous and monoicous species calculated within species pairs (PSO). Statistical tests are permutation t-tests using 100,000 permutations, p-values are displayed in parentheses. \*  $0.01 < P < 0.05$ ; \*\*  $0.001 < P < 0.01$ ; \*\*\*  $P < 0.001$ . E) Principal component analysis (PCA) plot of all the RNA-seq samples, using ASOs. Monoicous species are plotted in brown, female samples in red and male samples in blue.

176 (pairwise single-copy OGs; PSOs, Figure 2A). We were able to infer between 6,109 and 11,953 PSOs for  
177 each of the four pairs of species (Figure 2A; Tables S6-S10). PSOs were classified as being sex-biased or  
178 unbiased by comparing male and female expression in each dioicous species ( $\text{FDR} < 0.05$ ,  $\text{FC} > 2$ ). We then  
179 examined the patterns of expression of male-, female- and unbiased PSOs in dioicous males and females  
180 and in the corresponding monoicous species.

181 In three out of the four species pairs, the levels of expression of sex-biased genes in the monoicous species  
182 were similar to the values measured for orthologues in females of the corresponding dioicous species  
183 (Figure 4A). In these three pairs, male-biased genes were downregulated in the monoicous species  
184 compared with males, and they displayed similar expression levels to male-biased genes in females of the  
185 dioicous species, suggesting that de-masculinisation of gene expression of the monoicous species  
186 counterpart occurred frequently. Female-biased genes were expressed at similar levels in *S. firma* and *D.*  
187 *herbacea* females compared with the corresponding monoicous species. In the *S. polyschides-S.*  
188 *dermatodea* pair of species, female-biased genes had a similar pattern in males and monoicous. In the *S.*  
189 *rigidula/H. paniculata* species pair, no significant difference was detected between the expression of sex-  
190 biased and unbiased genes between the two species. Note, however, that results for *S. rigidula/H.*  
191 *paniculata* were more difficult to interpret, as the low number of sex-biased genes precluded robust  
192 statistical analysis.

193 We next investigated the gene expression profiles of monoicous species in order to test whether their  
194 transcriptional patterns resemble those of their male or female dioicous counterparts. We computed the  
195 Pearson product-moment coefficient of regressions of gene expression profiles (in  $\log_2(\text{TPM}+1)$ ) of males  
196 or females compared with that of the monoicous species within each species pair. We compared Pearson  
197 correlation coefficients for both sex-biased genes and unbiased genes in both males or females, considering  
198 sex-biased genes in males and females as independent groups. We also compared the correlations of  
199 expression profiles with the orthologs of sex-biased and unbiased genes in the monoicous species,  
200 separately for males and females. These groups of sex-biased versus unbiased genes being expressed within  
201 the same individuals, we considered them as dependant groups in the *cocor* package (Diedenhofen &

202 Musch, 2015). Altogether, these analyses indicated that, with the exception of the *S. rigidula*-*H. paniculata*  
203 species pair, the gene expression profiles of the monoicous species were significantly more similar to those  
204 of females than they were to male profiles (Figure 4B). Moreover, the close association between female  
205 and monoicous expression profiles was observed for both sex-biased and unbiased genes (Figure 4B, black  
206 asterisks at the top).

207 Interestingly, with the exception of the Ectocarpales species pair (*S. firma*-*C. linearis*), sex-biased gene  
208 expression profiles diverged significantly less from the monoicous species than did that of the unbiased  
209 genes. We also noted that the highest similarity indexes for within species pairs were found for the species  
210 with the lowest level of sex-biased gene expression (*S. rigidula*), and the lowest similarity was observed for  
211 *S. firma*, the species with the highest level of sex-biased gene expression (Figure 4B).

212 Taken together, the above observations suggest that gene expression profiles of monoicous species tend  
213 to be more closely related to the females of the related dioicous species, and this similarity appears to be  
214 driven by sex-biased genes, in particular male-biased genes. The tendency to reproduce the female  
215 transcriptome in the monoicous species was repeatable in independent transitions to co-sexuality.

#### 216 *IS SELECTION INVOLVED IN GENE EXPRESSION CHANGES DURING TRANSITION TO MONOICY?*

217 To examine whether changes in gene expression during transition to co-sexuality were the result of  
218 selective or neutral forces, we computed the degree of directional selection using  $\Delta x$ . This parameter  
219 evaluates the divergence in expression level in relation to the variation in expression level seen across  
220 replicates<sup>5,26,29</sup>. We computed  $\Delta x$  of the PSO sets, separately for each pair of species and reported the  
221 proportions of orthologs with an absolute  $\Delta x > 1$ , i.e., orthologs whose expression shift is attributable to  
222 directional selection.

223 Depending on the species pair, between 10.8% and 50% of unbiased genes exhibited expression shifts  
224 attributable to selection ( $|\Delta x| > 1$ ) (Table S11). We then asked whether male- and female-biased genes were  
225 preferentially concerned by adaptive expression shifts during transitions to monoicy compared with  
226 unbiased genes. Fisher's exact tests showed that for three out of four species pairs, male-biased genes  
227 were indeed more likely to display  $|\Delta x| > 1$  than unbiased genes. This was also the case for female-biased  
228 genes in *S. polyschides*-*S. dermatodea* pair of species (Fisher exact tests,  $P < 2.2 \times 10^{-16}$  in both sexes) and *D.*  
229 *herbacea*-*D. dudresnayi* pair (Fisher exact tests,  $P = 3.9 \times 10^{-3}$  and  $P = 1.8 \times 10^{-5}$  in females and males,  
230 respectively). In *S. polyschides*-*S. dermatodea* and *S. rigidula*-*H. paniculata*, female-biased genes showed  
231 lower levels of adaptive evolution of expression compared with unbiased genes (Table S11, Figure 4C).  
232 Taken together, our observations indicate that male-biased genes preferentially exhibit a shift in expression  
233 during the transition to monoicy that may be explained by directional selection.

234 We also assessed if evolution of gene expression during the transition to monoicy has been driven by DNA  
235 sequence evolution, by using measures of sequence divergence ( $d_N/d_S$ ). We computed  $d_N/d_S$  for male-  
236 biased, female-biased and unbiased genes for each of the dioicy-monoicy species pairs. For all four pairs,  
237 male-biased genes consistently exhibited higher evolutionary rates than female-biased and unbiased  
238 genes, although this difference was significant only for the *S. polyschides*-*S. dermatodea* species pair (Figure

239 4D, Table S12). As this is the ‘youngest’ species pair (Figure 1), it appears that the level of sequence  
240 divergence during transition to monoicy is not associated with the age of transition.

241 Taken together, our observations indicate that shifts from dioicy to monoicy involved modifications to  
242 transcriptional patterns (expression divergence) mostly at male-biased genes that were likely driven by  
243 selection but also coding sequence evolution.

#### 244 *CONVERGENT GENE EXPRESSION CHANGES ASSOCIATED WITH TRANSITION TO MONOICY*

245 In order to assess the extent to which gene expression changes occurring during the transition to monoicy  
246 were shared across the four species pairs, we focused on the single-copy orthologs across the eight species,  
247 herein termed ‘All Single-copy Orthologs’ (ASO). We found a total of 1,708 ASO (following the same  
248 methods as for DSO, see methods).

249 Among the 1,708 ASOs, 718 were sex-biased in at least one dioicous species (Tables S13, S14). Sex-biased  
250 genes were not over-represented among ASOs (Fisher exact test,  $P = 0.097$ ). Sixty one percent of the ASOs  
251 (1,043 out of 1,708) exhibited a conserved pattern of expression across all monoicous species compared  
252 to the dioicous species. This proportion was significantly different from what was expected by chance  
253 (permutation tests,  $P = 0.0255$ , 10,000 permutations) suggesting convergent gene expression changes  
254 during transition to monoicy across all studied pairs of species. Decomposition of variance components for  
255 the 1,708 ASOs detected a clear pattern of grouping of monoicous species, further illustrating the extensive  
256 convergence of gene expression during the transition from dioicy towards monoicy (Figure 4E). Functional  
257 analysis of genes that are convergently expressed during the transition to monoicy highlighted terms such  
258 as nucleic acid metabolic processes and transmembrane transport (Figure S2).

259 About half (527) of the 1,043 genes that were consistently differentially expressed in monoicous versus  
260 dioicous species had a  $|\Delta_x| > 1$ , which is significantly more in proportion than among the rest of the ASO  
261 (290 genes with  $|\Delta_x| > 1$  among 665 ASO, Fisher exact test  $P = 0.00543$ ). This observation indicates that  
262 convergent gene expression changes may be associated with directional selection during the switch to  
263 monoicy.

264 We next tested whether sexual selection potentially occurring in males and females of dioicous species  
265 would be relaxed in monoicous individuals. This would translate by a reduction of purifying selection  
266 resulting in increased sequence divergence (increased  $d_N/d_S$ ). Convergent genes (i.e., genes exhibiting a  
267 convergent pattern of gene expression in monoicous species) tended to exhibit faster divergence rates  
268 compared with non-convergent genes although the difference was not significant (permutation  $t$ -test,  $P =$   
269  $0.0566$ ). Noteworthy, male-biased (but not female-biased) genes showed significantly higher  $d_N/d_S$  than  
270 unbiased genes (Table S15).

271 A likelihood ratio test of branch models (after Benjamin-Hochberg correction for multiple testing),  
272 identified 689 orthologs under positive selection on monoicous branches, 404 of which exhibited  
273 convergent gene expression changes. Orthologs under positive selection were over-represented among  
274 genes with convergent gene expression (Fisher exact test,  $P = 0.025$ ). Taken together, these observations

275 suggest that directional selection plays a role in driving changes in expression patterns during transitions  
276 to co-sexuality.

## 277 DISCUSSION

### 278 *PHENOTYPIC SEXUAL DIMORPHISM AND SEX-BIASED GENE EXPRESSION ARE UNCOUPLED IN BROWN* 279 *ALGAE*

280 Although morphological and physiological differences between males and females are ultimately due to  
281 divergences between sex chromosomes in species with genetic sex determination (Bachtrog et al. 2014),  
282 the majority of morphological sexual dimorphism is thought to be associated with autosomal sex-biased  
283 gene expression<sup>3-5</sup>. Thus, it would be expected that species showing more prominent differences in  
284 morphology between male and female would also be characterised by high levels of sex-biased gene  
285 expression, as has been shown to be the case in birds<sup>27</sup>. Our study, in contrast, revealed no correlation  
286 between the level of sex-biased gene expression and the degree of phenotypic sexual dimorphism in the  
287 brown algae studied here. Therefore, the link between gene expression evolution and sexual selection is  
288 uncertain for these organisms, and may reflect a lower degree of sexual selection in the brown algae  
289 compared with animals. Brown algae have relatively low levels of sexual dimorphism<sup>9,19</sup> and are broadcast  
290 spawners so the opportunities for mate choice and/or mating competition are mainly constrained to  
291 interactions involving male and female gametes and not gametophytes<sup>30</sup>. Consistent with the idea that  
292 gamete sexual selection may occur (and perhaps not so much gametophyte sexual selection), it has been  
293 shown recently that in the absence of males, female gametes of brown alga populations lose their sexual  
294 morphological characteristics, e.g. female gametes produce lower levels of pheromone and engage in  
295 parthenogenesis more rapidly<sup>31</sup>.

### 296 *SEX-BIASED GENES HAVE HIGH TURNOVER BUT EXHIBIT FUNCTIONAL CONVERGENCE*

297 Although dioecy is predicted to be the ancestral sexual system in brown algae<sup>22</sup> our results clearly indicate  
298 that sex-bias in the expression of individual genes is neither ancestral nor convergent. We found a very  
299 limited level of shared (ancestral) sex-biased gene expression across the studied brown algal species, and  
300 instead our data is consistent with lineage-specific recruitment of sex-biased genes. Our observations  
301 emphasize therefore a substantial turnover of sex-biased expression among brown algal genes.

302 Although the dioicous brown algal species studied here shared very few sex-biased genes, we found a  
303 remarkable level of convergence in terms of sex-biased gene function. These include biological functions  
304 that were previously found to be enriched in *Ectocarpus* gametophytes<sup>9,32</sup> further underscoring the  
305 conservation of sex-biased gene function and supporting primary sexual dimorphic roles. Considering that  
306 brown algae share an ancestral sex chromosome, and that genes within the non-recombining sex  
307 determining region play a role in sex<sup>33</sup>, one possibility is that sexual characteristics in these UV systems  
308 mainly involve genes within the SDR together with a relatively limited number of autosomal genes involved  
309 in primary sexual dimorphisms. In other words, differences between sexes arise mainly from the different  
310 physiological processes directly linked to the production of male or female gametes rather than extensive  
311 sexual selection, sexual specialization and/or sexual antagonism (i. e, secondary sexual dimorphism)<sup>6</sup>.

312 *FATE OF SEX-BIASED GENE EXPRESSION DURING THE TRANSITION TO MONOICY*

313 Our sampling of species distributed across the brown algae phylogeny, associating pairs of related dioicous  
314 and monoicous species, allowed us to trace the fate of sex-biased gene expression during independent  
315 events of transition from dioicy to monoicy. With the exception of one species pair, sex-biased genes  
316 exhibited adaptive expression shifts during the transition to monoicy. Male-biased genes, specifically, were  
317 the main drivers of gene expression changes during the transition to monoicy, while unbiased genes  
318 exhibited limited changes in pattern of expression with the switch in sexual system. In the model brown  
319 alga *Ectocarpus*, RNA-seq analysis of multiple tissues and life cycle stages indicated that sex-biased genes  
320 have restricted patterns of expression, which is a proxy for limited pleiotropy<sup>9</sup>. Pleiotropy is known to  
321 restrict gene evolution, imposing stricter functional constraints on pleiotropic genes<sup>34,35</sup>. The reduced  
322 pleiotropy of sex-biased compared with unbiased genes may increase their propensity to adaptively shift  
323 towards their evolved optimal expression profile during evolutionary transitions, in this case the transition  
324 to monoicy<sup>4,35,36</sup>.

325 Sex-biased genes in dioicous brown algae such as *Ectocarpus* sp. typically display high evolutionary rates  
326 compared to unbiased genes due either to directional selection or relaxed purifying selection<sup>9</sup>. With the  
327 transition to monoicy, increased relaxation of sex-specific purifying selection acting on sex-biased genes  
328 may be expected, leading to increased rates of sequence evolution. Accordingly, male-biased genes for all  
329 species pairs presented faster evolutionary rates (although not significant for all species) during the switch  
330 to monoicy, compared with female-biased or unbiased genes. This observation points to a shared process  
331 of sexually antagonistic selection within dioicous species, especially in males, that allowed for faster  
332 evolutionary rates of male-biased genes when relaxed during the transition from dioicy to monoicy.

333 *CONVERGENT CHANGES ASSOCIATED WITH THE BREAKDOWN OF DIOICY AND ORIGIN OF MONOICY*

334 Convergent evolution, where a similar trait evolves in different lineages, provides an opportunity to study  
335 the repeatability of evolution. In the brown algae, co-sexuality has repeatedly emerged from uni-sexual  
336 ancestors<sup>22</sup>. Strikingly, we found that more than half (61%) of the orthologs across the four pairs of species  
337 displayed similar expression shifts concomitant with the transition to monoicy, indicating that common,  
338 independently acquired mechanisms are associated with co-sexuality. Remarkably, a substantial number  
339 of these convergent genes (38.7%) were under positive selection, underlying the idea that convergent  
340 changes associated with the shift of sexual system may be driven by comparable evolutionary pressures  
341 across these distant species.

342 In our study, the expression profiles of gametophytes of all four monoicous species resembled those of the  
343 female gametophytes of their dioicous counterpart. Moreover, sex-biased genes tended to maintain the  
344 level of expression they had in dioicous species, suggesting that they retained their ancestral function in  
345 the context of derived monoicy. When their expression shifted, sex-biased genes, and especially male-  
346 biased genes showed signs of selection acting on their expression level to a greater extent than it acted on  
347 unbiased genes. Together, our results demonstrate that common mechanisms underlie the transition to  
348 monoicy across distant brown algal lineages and suggest that independent events of loss of dioicy may have  
349 involved acquisition of genes related to male development by a female gametophyte. The work presented

350 here establishes therefore a framework for understanding at the genomic level how co-sexual systems arise  
351 from ancestral haploid UV sexual systems.

## 352 MATERIALS AND METHODS

### 353 *SAMPLE PREPARATION, RNA EXTRACTIONS AND SEQUENCING*

354 The algal strains used and sequencing statistics and BioProject accession number are listed in Table S1.  
355 Gametophytes of all eight species were cultured at 13 °C in autoclaved natural sea water (NSW)  
356 supplemented with half-strength Provasoli solution (PES; <sup>37</sup>) with a light:dark cycle of 12:12 h (20 μmol  
357 photons m<sup>-2</sup> s<sup>-1</sup>) using daylight-type fluorescent tubes <sup>38</sup>. All manipulations were performed under a laminar  
358 flow hood in sterile conditions. Immature gametophytes (i.e., absence of sex-specific reproductive  
359 structures, oogonia or antheridia) of each strain were frozen in liquid nitrogen and kept at -80C until RNA  
360 extraction.

361 RNA from male and female pools was extracted from triplicate samples (each containing at least 800  
362 individual gametophytes; except for *S. polyschides* and *S. dermatodea* where two replicates were used)  
363 using Qiagen RNA extraction Plant Mini kit. RNA quality and quantity were assessed using an Agilent 2100  
364 bioanalyzer, associated with an RNA 6000 Nano kit. For each replicate, the RNA was quantified and cDNA  
365 was synthesized using an oligo-dT primer. The cDNA was fragmented, cloned, and sequenced by FASTERIS  
366 (CH-1228 Plan-les-Ouates, Switzerland), using Illumina Hi-seq2000 for *Saccorhiza* and *Desmarestia* species;  
367 by Genome Quebec using an or Nextgen6000 for *Halopteris* and *Chordaria* species; and by Genoscope using  
368 Illumina Hi-seq 4000 for *Sphacelaria* and *Sphaerotrichia* species (see Table S1 for details).

### 369 *TRANSCRIPTOME ASSEMBLIES AND GENE SET PREDICTIONS*

370 Predicted gene sets were constructed for each species base on genome and transcriptome assemblies. In  
371 order to filter out potential contamination, first round assembled contigs were blasted against the NCBI  
372 non-redundant (nr) protein database using diamond v 0.9.21 <sup>39</sup> and reads that mapped on contigs with  
373 non-eukaryotic taxons were removed using blobtools v 1.0.1 <sup>40</sup>. *De novo* transcriptomes were assembled  
374 using Trinity (*Saccorhiza polyschides*, *Saccorhiza dermatodea*, *Desmarestia dudresnayi*, *Desmarestia*  
375 *herbacea* female, *Halopteris paniculata*, *Sphacelaria rigidula*) or rnaSPADES v 3.12.0 (*Chordaria linearis*,  
376 *Sphaerotrichia firma*) with kmer size of 55.

377 All genomes were soft-masked using Repeatmasker v 4.0.9 after building a *de novo* transposable elements  
378 and repeats database with RepeatModeler v 1.0.8 <sup>41</sup>. BRAKER2 <sup>42</sup> and PASA (for *Desmarestia herbacea* <sup>43</sup>,  
379 using input predicted protein from the reference species *Ectocarpus* sp. (EctsiV2\_prot\_LATEST.tfa <sup>44</sup>, were  
380 used to predict gene sets used for all downstream analyses.

381 The final assemblies are available in NCBI (BioProject accession number PRJNA733856). Transcriptome  
382 completeness was assessed using BUSCO v3 eukaryote gene set as reference (Odb9). Transcripts that had  
383 DNA data support for only one sex (potentially sex-linked) were tested with PCR using at least 4 males and  
384 4 females per species and removed from the sex-biased gene analysis. PCR primers are detailed in Table  
385 S16.

386 *EXPRESSION QUANTIFICATION AND IDENTIFICATION OF SEX-BIASED GENES IN DIOICIOUS SPECIES*

387 RNAseq reads adaptors were trimmed using trimmomatic v0.38<sup>45</sup> which was also used for read-quality  
388 filtering: reads were removed if the leading or trailing base had a Phred score <3, or if the sliding window  
389 Phred score, averaged over four bases, was <15. Reads shorter than 36 bases were discarded (as well as  
390 pair of reads, if one of the pair was <36 bases long). Trimmomatic-processed RNAseq reads from each  
391 library were used to quantify gene expression with kallisto v 0.44.0<sup>46</sup> using 31 bp-long kmers and predicted  
392 transcript of each species. RNAseq libraries were composed of stranded (--fr-stranded or --rf-stranded  
393 option) single-end reads (--single option) or paired-end reads (Table S1). A gene was considered expressed  
394 in a given species and/or a given sex when at least one library displayed an expression level (in TPM) above  
395 the 5<sup>th</sup> percentile of TPM distribution across all genes and libraries within a species and sex. Following  
396 <sup>47</sup>transcript abundances were then summed up within genes and multiplied by the total library size, using  
397 the tximport package<sup>25</sup> to obtain the expression level for each gene in transcripts per million reads (TPM).

398 Estimates of sex-biased gene expression in dioicous species were obtained using read count matrices as  
399 input for the DESeq2 package (Love et al., 2014) in R 3.6.3. *P*-values were corrected for multiple testing  
400 using Benjamini and Hochberg's algorithm in DESeq2, applying an adjusted *P*-value cut-off of 0.05 for  
401 differential expression analysis. Genes with a minimum of 2-fold change expression level between sexes  
402 were retained as sex-biased.

403 *QUANTIFICATION OF PHENOTYPIC SEXUAL DIMORPHISM*

404 Individual gametophytes from each of the strains were isolated in sea water and observed using an inverted  
405 transmitted light microscope DMI8 (Leica) with the LAS X software. Between 269 and 556 cells (348 cells  
406 on average per sex and per species) across five different gametophytes per species were individually  
407 measured using Fiji<sup>48</sup>. We used *t*-tests to compare cell length between groups. The difference in mean  
408 cell length between sexes of dioicous species was computed and used as a proxy for phenotypic sexual  
409 dimorphism. To investigate the relationship between phenotypic sexual dimorphism and extent in sex-  
410 biased expression, phenotypic dimorphism was regressed against the fraction of sex-biased genes in R.

411 *ORTHOLOGY AND EVOLUTIONARY RATES WITHIN SPECIES PAIRS*

412 We inferred pairwise single-copy orthologs (PSO) within the four species pair using Orthofinder with default  
413 parameters<sup>49</sup>. We used kallisto v 0.44.0 to quantify expression levels for PSO within species pairs. In order  
414 to infer the potential role of selection in expression changes between dioicous and monoicous species we  
415 computed  $\Delta_x$ . To summarize we calculated  $\Delta_x = d/r$  with *d* and *r* respectively given by:

416  $d = \text{Mean } X_{\text{dioicous}} - \text{Mean } X_{\text{monoicous}} / \text{Mean } X_{\text{dioicous}}$

417 and

418  $r = [X_{\text{dioicous}}]^{\text{high}} - [X_{\text{dioicous}}]^{\text{low}} / \text{Mean } X_{\text{dioicous}}$

419 where *X* is the expression level measured in TPM, 'High' and 'Low' represent the maximum and minimum  
420 values. Fisher exact tests were computed to detect whether female-biased genes (FBG) and male-biased  
421 genes (MBG) were more likely to show an absolute value of  $\Delta_x > 1$  compared to unbiased genes.



422 Orthologous proteins between species pairs were aligned with MAFFT v7.453<sup>50</sup> the alignments were  
423 curated with Gblocks v0.91b<sup>51</sup> and back-translated to nucleotides using translatorX<sup>52</sup>. We used these  
424 nucleotide alignments as input for phylogenetic analysis by maximum likelihood (PAML4, CodeML,<sup>53</sup>) to  
425 infer pairwise  $d_N/d_S$  ( $\omega$ ) with F3x4 model of codon frequencies. We retained orthologs with  $0 < d_S < 2$  as  
426 valid for further analysis. We compared species and sexes evolutionary rates separately for female-biased,  
427 male-biased and unbiased genes, using permutation  $t$ -tests in R with 100,000 permutations.

#### 428 *EVOLUTION OF SEX-BIASED GENE EXPRESSION*

429 We inferred a single orthologous gene set for the four dioicous species (DSO) using Orthofinder with default  
430 parameters. Following the methods used in<sup>54</sup> we included in the DSOs the orthogroups genes that were  
431 1:1:1:0, likely due to situations in which a single-copy ancestral gene was lost in a single species. To further  
432 account for gene prediction errors, we also included orthogroups with a single species presenting two-  
433 genes that aligned on more than 60% of their length as duplicate genes.

434 A well resolved phylogeny of the Pheophyceae was used as reference gene tree<sup>24</sup> to infer where sex-  
435 biased gene expression evolved along the phylogenetic tree. We coded DSO as either male-biased, female-  
436 biased or unbiased for each species and used the ape package<sup>55</sup> in R to reconstruct the discrete ancestral  
437 state *via* maximum likelihood. Proportions of ancestral genes in each category were plotted as pie-charts  
438 on tree nodes and gain/loss of bias were reported on each branch. We further tested the significance of  
439 overlap between sex-biased genes identified within dioicous species with exact multi-set intersection test  
440 implemented in the SuperExactTest package v 1.0.7 in R<sup>56</sup>.

441 We inferred expression profile similarity index between monoicous species and males and females of  
442 dioicous species within pairs as the Pearson correlation coefficient of PSO expression levels in  $\log_2(\text{TPM} +$   
443  $1)$ . This analysis was performed for all expressed genes, and separately for MB, FB and unbiased genes. We  
444 compared Pearson coefficients of regression within each species pair, using the cocor package<sup>57</sup>,  
445 considering gene expression profiles of males and females as independent gene sets. We also compared  
446 SBG with unbiased genes within sexes, considering these gene sets as dependent. We report the  $P$ -value  
447 based on Fisher's  $z$  or, when possible, Silver, Hittner and May's modification of Dunn and Clark's  $z$ . Pearson's  
448 coefficients were plotted for each species pair.

#### 449 *CONVERGENT EXPRESSION CHANGES*

450 Convergent changes associated with transitions to monoicy were investigated on single-copy orthologs  
451 inferred across the eight studied species (termed 'All Single-copy Orthologs', ASO) following the same  
452 methods as those used for the DSOs. Using this data set, we quantified gene expression with kallisto as  
453 described above, and DESeq2 was used to infer orthologs significantly affected by sexual system but not  
454 species pair (lfcShrink with "ashr" method, sexual system contrast; Stephens, 2016). Significance of the  
455 number of convergent expression changes was tested with permutation tests (100,000 permutations). We  
456 used the ComplexHeatmap package<sup>58</sup> in R to visualize gene expression for each replicate. Orthogroups  
457 with inconsistent sex-bias across different species ( $n=139$ ) were removed from the  $d_N/d_S$  analysis of  
458 convergent gene evolution.

459 Intersects between genes across PSO, DSO and ASO were represented using the UpSetR package v1.4.0<sup>59</sup>.

#### 460 *ASO EVOLUTIONARY RATES*

461 Following the same process described for pairwise orthologs, we aligned and studied molecular  
462 sequence divergence for all species orthologs (ASO) using CodeML. We used a 'two-ratio' branch  
463 model (model = 2, Nssites = 0) to specifically study divergence on monoicous branches (foreground  
464 branches). We compared  $\omega$  values separately between sex-biased (male-biased and female-biased  
465 genes) and unbiased genes with permutation *t*-tests (10,000 permutations). We also ran two branch-  
466 site models in PAML to detect positive selection in foreground branches (model=2, Nssite=2,  $\omega$ =1  
467 fixed (Null) or allowed to vary). Likelihood-ratio tests were used to compared the model of selection  
468 with the null model in order to detect orthologs with sites under positive selection in the monoicous  
469 branches. LRT *P*-values were corrected for multiple testing using Benjamini and Hochberg's algorithm  
470<sup>60</sup>.

#### 471 *FUNCTIONAL ANNOTATION ANALYSIS*

472 Predicted genes and orthogroups were blasted against the NCBI non-redundant (nr) protein database with  
473 blast (v2.9.0). Functional annotation was performed using BLAST2GO<sup>28</sup>, as well as the InterProScan  
474 prediction of putative conserved protein domains<sup>61</sup>. Gene set enrichment analysis was carried out  
475 separately for each geneset using Fisher's exact test implemented in the TopGO package, with the *weight01*  
476 algorithm<sup>62</sup>. We investigated enrichment in terms of biological process ontology and reported significant  
477 GO-terms with *P*-value < 0.01.

478 All statistical analyses were performed in R 3.6.3, plots were produced with ggplot2 in R  
479 (<https://ggplot2.tidyverse.org/>).

#### 480 **ACKNOWLEDGMENTS**

481 We would like to thank J.R. Pannell for valuable comments on the present study, I. Theodorou for help with  
482 microscopy, A. F. Peters for help with algal cultures and T. Broquet for comments and advice on statistical  
483 methods. This work was supported by an ERC grant to SMC (grant agreement 864038) and the France  
484 Génomique National infrastructure project Phaeoexplorer (ANR-10-INBS-09).

#### 485 **DATA**

486 Raw reads have been deposited in the SRA. Accession codes are given in Table S17.

487 SUPPLEMENTAL FIGURES

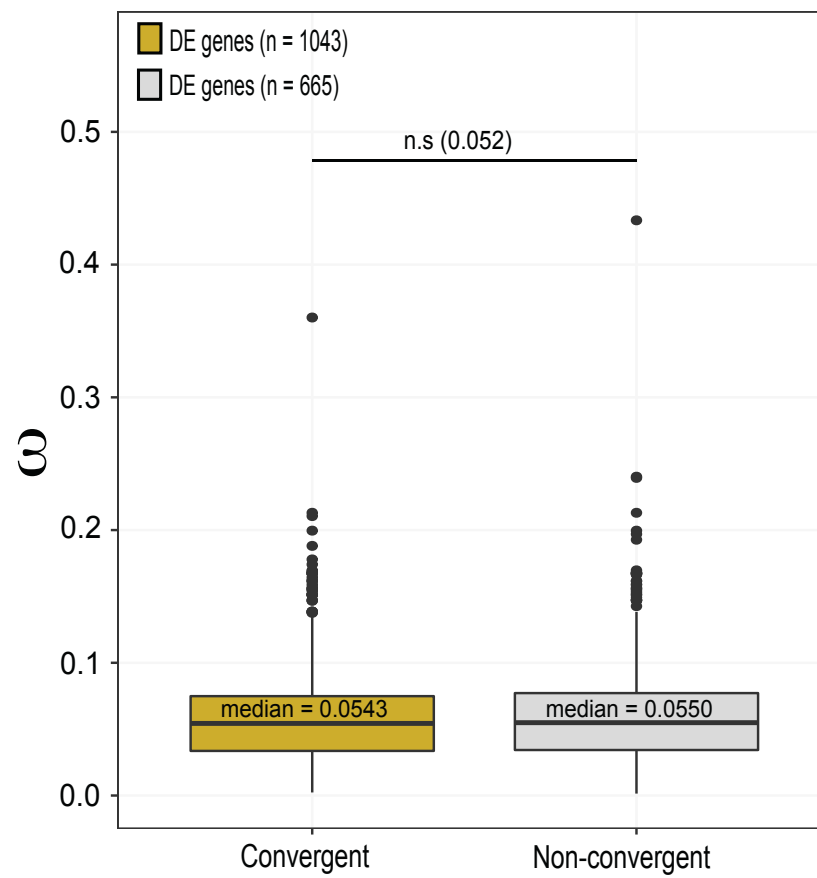

Figure S1. Sequence divergence, measured as  $d_N/d_S (\omega)$ , between convergent and non-convergent genes across all species pairs (ASO).

488

489

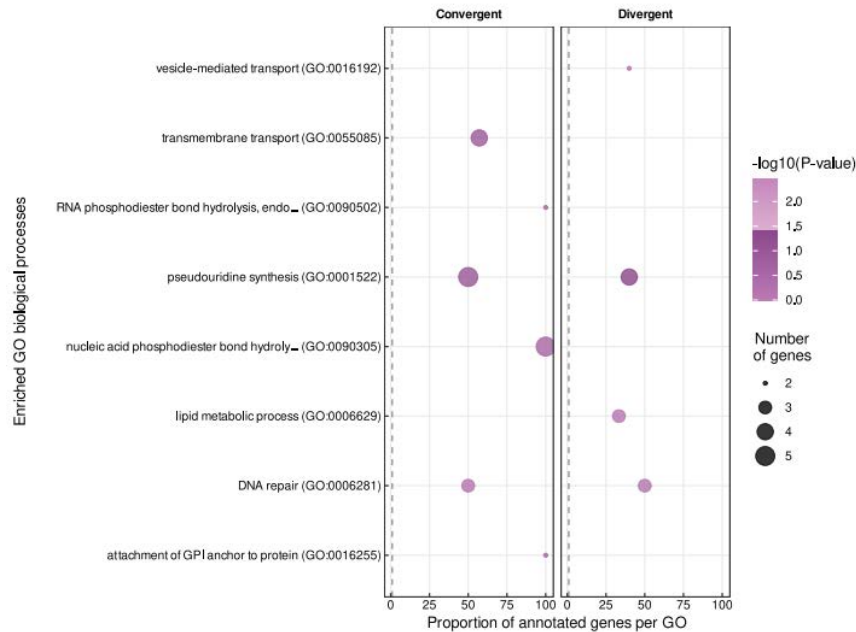

Figure S2. Functional analysis (enriched GO terms for biological processes) of genes that are convergently or divergently expressed in dioicous versus monoicous species

## 490 TABLE LEGENDS

491 Table S1. Brown algae species used in the study and summary of gene expression data sets.

492 Table S2. Summary statistics of sex-biased gene expression. Fractions of sex-biased genes are calculated  
493 over the number of expressed genes in the sex of bias.

494 Table S3. Summary of sexually dimorphic traits in the four dioicous brown algae species investigated in the  
495 present study.

496 Table S4. Orthogroups belonging to the dioicous single-copy orthologs geneset (DSO) and their  
497 corresponding gene and bias per species.

498 Table S5. Description of GO-term enrichment of sex-biased genes identified in each dioicous species.  $P$ -  
499 values correspond to Fisher exact tests ( $FDR < 0.05$ ).

500 Table S6. Summary description of all pairwise single-copy orthologs (PSO).

501 Table S7. Orthogroups belonging to the pairwise single-copy orthologs genes et (PSO) within the  
502 Tilopteridales species pair. Mean expression level in TPM across replicates as well as the bias status in the  
503 dioicous species are reported.

504 Table S8. Orthogroups belonging to the pairwise single-copy orthologs gene set (PSO) within the  
505 Desmarestiales species pair. Mean expression level in TPM across replicates as well as the bias status in the  
506 dioicous species are reported.

507 Table S9. Orthogroups belonging to the pairwise single-copy orthologs geneset (PSO) within the  
508 Sphacelariales species pair. Mean expression level in TPM across replicates as well as the bias status in the  
509 dioicous species are reported.

510 Table S10. Orthogroups belonging to the pairwise single-copy orthologs geneset (PSO) within the  
511 Ectocarpales species pair. Mean expression level in TPM across replicates as well as the bias status in the  
512 dioicous species are reported.

513 Table S11. Summary statistics of  $\Delta_x$  within the four species pairs. Male-biased genes (MBG) and female-  
514 biased genes (FBG) that were significantly more likely or less likely to present  $|\Delta_x| > 1$  were highlighted in  
515 green and purple, respectively (Fisher's exact tests).

516 Table S12. *P*-values of permutation *t*-tests (100,000 permutations) of sequence divergence data (dN/dS)  
517 calculated within species pair, between female-, male-biased and unbiased genes.

518 Table S13. Summary description of all single-copy orthologs (ASO)

519 Table S14. Orthogroups belonging to the all single-copy orthologs geneset (ASO). Mean expression level in  
520 TPM across replicates as well as the bias status in the dioicous species are reported.

521 Table S15. *P*-values of permutation *t*-tests (10,000 permutations) of sequence divergence data (dN/dS),  
522 calculated specifically for monoicous branches (branch model) across ASOs, between female-, male-biased  
523 and unbiased genes. Significant difference of divergence with unbiased genes are put in bold.

524 Table S16. Primers used to test candidate sex-linked contigs in the different brown algal species.

525 Table S17. Accession references.

526

## 527 REFERENCES

- 528 1. Bachtrog, D. *et al.* Are all sex chromosomes created equal? *Trends Genet. TIG* **27**, 350–357 (2011).
- 529 2. Charlesworth, B. & Charlesworth, D. A Model for the Evolution of Dioecy and Gynodioecy. *Am. Nat.*  
530 **112**, 975–997 (1978).
- 531 3. Mank, J. E. & Ellegren, H. Are sex-biased genes more dispensable? *Biol. Lett.* **5**, 409–412 (2009).
- 532 4. Parsch, J. & Ellegren, H. The evolutionary causes and consequences of sex-biased gene expression. *Nat.*  
533 *Rev. Genet.* **14**, 83–87 (2013).
- 534 5. Zemp, N. *et al.* Evolution of sex-biased gene expression in a dioecious plant. *Nat. Plants* **2**, 16168  
535 (2016).

- 536 6. Charlesworth, D. Does sexual dimorphism in plants promote sex chromosome evolution? *Environ. Exp.*  
537 *Bot.* **146**, (2017).
- 538 7. Cossard, G. G., Toups, M. A. & Pannell, J. R. Sexual dimorphism and rapid turnover in gene expression  
539 in pre-reproductive seedlings of a dioecious herb. *Ann. Bot.* mcy183–mcy183 (2018)  
540 doi:10.1093/aob/mcy183.
- 541 8. Harrison, P. W. *et al.* Sexual selection drives evolution and rapid turnover of male gene expression.  
542 *Proc. Natl. Acad. Sci. U. S. A.* **112**, 4393–4398 (2015).
- 543 9. Lipinska *et al.* Sexual dimorphism and the evolution of sex-biased gene expression in the brown alga  
544 *Ectocarpus*. *Mol. Biol. Evol.* **32**, 1581–1597 (2015).
- 545 10. Cossard, G. G., Gerchen, J. F., Li, X., Cuenot, Y. & Pannell, J. R. The rapid dissolution of dioecy by  
546 experimental evolution. *Curr. Biol. CB* (2021) doi:10.1016/j.cub.2020.12.028.
- 547 11. Kafer, J., Marais, G. A. B. & Pannell, J. R. On the rarity of dioecy in flowering plants. *Mol. Ecol.* **26**, 1225–  
548 1241 (2017).
- 549 12. Charnov, E., Bull, J. J. & Maynard Smith, J. Why be an hermaphrodite? *Nature* **263**, 125–126 (1976).
- 550 13. Crossman, A. & Charlesworth, D. Breakdown of dioecy: models where males acquire cosexual  
551 functions. *Evol. Int. J. Org. Evol.* **68**, 426–440 (2014).
- 552 14. Ehlers, B. K. & Bataillon, T. ‘Inconstant males’ and the maintenance of labile sex expression in  
553 subdioecious plants. *New Phytol.* **174**, 194–211 (2007).
- 554 15. Umen, J. & Coelho, S. Algal Sex Determination and the Evolution of Anisogamy. *Annu. Rev. Microbiol.*  
555 (2019) doi:10.1146/annurev-micro-020518-120011.
- 556 16. Bachtrog, D. *et al.* Sex determination: why so many ways of doing it? *PLoS Biol.* **12**, e1001899 (2014).
- 557 17. Coelho, S. M., Gueno, J., Lipinska, A. P., Cock, J. M. & Umen, J. G. UV chromosomes and haploid sexual  
558 systems. *Trends Plant Sci.* **23**, 794–807 (2018).

- 559 18. Mignerot, L. & Coelho, S. M. The origin and evolution of the sexes: Novel insights from a distant  
560 eukaryotic lineage. *C. R. Biol.* **339**, 252–257 (2016).
- 561 19. Luthringer, R., Cormier, A., Peters, A. F., Cock, J. M. & Coelho, S. M. Sexual dimorphism in the brown  
562 algae. *Perspectives in Phycology* **1**, 11–25 (2015).
- 563 20. Villarreal, J. C. & Renner, S. S. Correlates of monoicy and dioicy in hornworts, the apparent sister group  
564 to vascular plants. *BMC Evol. Biol.* **13**, 239 (2013).
- 565 21. Bringloe, T. T. *et al.* Phylogeny and Evolution of the Brown Algae. *Crit. Rev. Plant Sci.* **39**, 281–321  
566 (2020).
- 567 22. Heesch, S. *et al.* Evolution of life cycles and reproductive traits: insights from the brown algae. *bioRxiv*  
568 (2019) doi:10.1101/530477.
- 569 23. Cánovas, F. G., Mota, C. F., Serrão, E. A. & Pearson, G. A. Driving south: a multi-gene phylogeny of the  
570 brown algal family Fucaceae reveals relationships and recent drivers of a marine radiation. *BMC Evol.*  
571 *Biol.* **11**, 371 (2011).
- 572 24. Kawai, H., Hanyuda, T., Draisma, S. G. A., Wilce, R. T. & Andersen, R. A. Molecular phylogeny of two  
573 unusual brown algae, *Phaeostrophion irregulare* and *Platysiphon glacialis*, proposal of the  
574 *Stschapoviales* ord. nov. and *Platysiphonaceae* fam. nov., and a re-examination of divergence times for  
575 brown algal orders. *J. Phycol.* **51**, 918–928 (2015).
- 576 25. Love, M. I., Huber, W. & Anders, S. Moderated estimation of fold change and dispersion for RNA-seq  
577 data with DESeq2. *Genome Biol.* **15**, 550 (2014).
- 578 26. Scharmann, M., Rebelo, A. G. & Pannell, J. R. High rates of evolution preceded shifts to sex-biased gene  
579 expression in *Leucadendron*, the most sexually dimorphic angiosperms. *bioRxiv*  
580 2021.01.12.426328 (2021) doi:10.1101/2021.01.12.426328.
- 581 27. Pointer, M. A., Harrison, P. W., Wright, A. E. & Mank, J. E. Masculinization of Gene Expression Is  
582 Associated with Exaggeration of Male Sexual Dimorphism. *PLOS Genet.* **9**, e1003697 (2013).

- 583 28. Conesa, A. & Götz, S. Blast2GO: A comprehensive suite for functional analysis in plant genomics. *Int. J.*  
584 *Plant Genomics* **2008**, 619832 (2008).
- 585 29. Ometto, L., Shoemaker, D., Ross, K. G. & Keller, L. Evolution of Gene Expression in Fire Ants: The Effects  
586 of Developmental Stage, Caste, and Species. *Mol. Biol. Evol.* **28**, 1381–1392 (2010).
- 587 30. Evans, J. P. & Lymbery, R. A. Sexual selection after gamete release in broadcast spawning invertebrates.  
588 *Philos. Trans. R. Soc. B Biol. Sci.* **375**, 20200069 (2020).
- 589 31. Hoshino, M., Okino, T. & Kogame, K. Parthenogenetic female populations in the brown alga  
590 *Scytosiphon lomentaria* (Scytosiphonaceae, Ectocarpales): decay of a sexual trait and acquisition of  
591 asexual traits. *J. Phycol.* (2018) doi:10.1111/jpy.12812.
- 592 32. Lipinska *et al.* Development of PCR-based markers to determine the sex of kelps. *PLoS ONE* **10**,  
593 e0140535 (2015).
- 594 33. Lipinska, A. P. *et al.* Multiple gene movements into and out of haploid sex chromosomes. *Genome Biol.*  
595 **18**, 104 (2017).
- 596 34. Duret, L. & Mouchiroud, D. Determinants of substitution rates in mammalian genes: expression pattern  
597 affects selection intensity but not mutation rate. *Mol. Biol. Evol.* **17**, 68–74 (2000).
- 598 35. Papakostas, S. *et al.* Gene pleiotropy constrains gene expression changes in fish adapted to different  
599 thermal conditions. *Nat. Commun.* **5**, 4071 (2014).
- 600 36. Kimura, M. & Ohta, T. On some principles governing molecular evolution. *Proc. Natl. Acad. Sci. U. S. A.*  
601 **71**, 2848–2852 (1974).
- 602 37. Starr, R. & Zeikus, J. UTEX—The Culture Collection of Algae at the University of Texas at Austin. *J. Phycol.*  
603 **29**, 1–106 (2004).
- 604 38. Coelho, S. M. *et al.* How to cultivate *Ectocarpus*. *Cold Spring Harb. Protoc.* **2012**, 258–261 (2012).
- 605 39. Buchfink, B., Xie, C. & Huson, D. H. Fast and sensitive protein alignment using DIAMOND. *Nat. Methods*  
606 **12**, 59–60 (2015).



- 607 40. Laetsch, D. & Blaxter, M. BlobTools: Interrogation of genome assemblies [version 1; referees: 2  
608 approved with reservations]. *F1000Research* 2017 6:1287 (2017).
- 609 41. Flynn, J. M. *et al.* RepeatModeler2 for automated genomic discovery of transposable element families.  
610 *Proc. Natl. Acad. Sci. U. S. A.* **117**, 9451–9457 (2020).
- 611 42. Brůna, T., Hoff, K. J., Lomsadze, A., Stanke, M. & Borodovsky, M. BRAKER2: automatic eukaryotic  
612 genome annotation with GeneMark-EP+ and AUGUSTUS supported by a protein database. *NAR*  
613 *Genomics Bioinforma.* **3**, lqaa108 (2021).
- 614 43. Haas, B. J. *et al.* Improving the Arabidopsis genome annotation using maximal transcript alignment  
615 assemblies. *Nucleic Acids Res.* **31**, 5654–5666 (2003).
- 616 44. Cormier, A. *et al.* Re-annotation, improved large-scale assembly and establishment of a catalogue of  
617 noncoding loci for the genome of the model brown alga *Ectocarpus*. *New Phytol.* **214**, 219–232 (2017).
- 618 45. Bolger, A. M., Lohse, M. & Usadel, B. Trimmomatic: a flexible trimmer for Illumina sequence data.  
619 *Bioinforma. Oxf. Engl.* **30**, 2114–2120 (2014).
- 620 46. Bray, N. L., Pimentel, H., Melsted, P. & Pachter, L. Near-optimal probabilistic RNA-seq quantification.  
621 *Nat. Biotechnol.* **34**, 525–527 (2016).
- 622 47. Sonesson, C. & Robinson, M. D. Bias, robustness and scalability in single-cell differential expression  
623 analysis. *Nat. Methods* **15**, 255–261 (2018).
- 624 48. Schindelin, J. *et al.* Fiji: an open-source platform for biological-image analysis. *Nat. Methods* **9**, 676–  
625 682 (2012).
- 626 49. Emms, D. M. & Kelly, S. OrthoFinder: solving fundamental biases in whole genome comparisons  
627 dramatically improves orthogroup inference accuracy. *Genome Biol.* **16**, 157 (2015).
- 628 50. Katoh, K. & Standley, D. M. MAFFT Multiple Sequence Alignment Software Version 7: Improvements in  
629 Performance and Usability. *Mol. Biol. Evol.* **30**, 772–780 (2013).

- 630 51. Talavera, G. & Castresana, J. Improvement of Phylogenies after Removing Divergent and Ambiguously  
631 Aligned Blocks from Protein Sequence Alignments. *Syst. Biol.* **56**, 564–577 (2007).
- 632 52. Abascal, F., Zardoya, R. & Telford, M. J. TranslatorX: multiple alignment of nucleotide sequences guided  
633 by amino acid translations. *Nucleic Acids Res.* **38**, W7-13 (2010).
- 634 53. Yang, Z. PAML 4: phylogenetic analysis by maximum likelihood. *Mol. Biol. Evol.* **24**, 1586–1591 (2007).
- 635 54. Lipinska, A. P. *et al.* Rapid turnover of life-cycle-related genes in the brown algae. *Genome Biol.* **20**, 35  
636 (2019).
- 637 55. Paradis, E. & Schliep, K. ape 5.0: an environment for modern phylogenetics and evolutionary analyses  
638 in R. *Bioinformatics* **35**, 526–528 (2019).
- 639 56. Wang, M., Zhao, Y. & Zhang, B. Efficient Test and Visualization of Multi-Set Intersections. *Sci. Rep.* **5**,  
640 16923 (2015).
- 641 57. Diedenhofen, B. & Musch, J. cocor: a comprehensive solution for the statistical comparison of  
642 correlations. *PLoS One* **10**, e0121945 (2015).
- 643 58. Gu, Z., Eils, R. & Schlesner, M. Complex heatmaps reveal patterns and correlations in multidimensional  
644 genomic data. *Bioinforma. Oxf. Engl.* **32**, 2847–2849 (2016).
- 645 59. Conway, J. R., Lex, A. & Gehlenborg, N. UpSetR: an R package for the visualization of intersecting sets  
646 and their properties. *Bioinforma. Oxf. Engl.* **33**, 2938–2940 (2017).
- 647 60. Benjamini, Y. & Hochberg, Y. On the Adaptive Control of the False Discovery Rate in Multiple Testing  
648 with Independent Statistics. *J. Educ. Behav. Stat.* **25**, 60–83 (2000).
- 649 61. Quevillon, E. *et al.* InterProScan: protein domains identifier. *Nucleic Acids Res.* **33**, W116-120 (2005).
- 650 62. Alexa, A. & Rahnenfuhrer. topGO: Enrichment Analysis for Gene Ontology. (2019).
- 651
